# Supplementary material for: Microfluidic Isolation of Circulating Tumor Cell Clusters by Size and Asymmetry
Source: PubMed Central journal article supplement (PMC5446400; doi:10.1038/s41598-017-01150-3), 2017-05-26
Supplement: 41598_2017_1150_MOESM7_ESM.pdf [file 41598_2017_1150_MOESM7_ESM.pdf]

## **Supplementary Information for Microfluidic Isolation of Circulating Tumor Cell Clusters by Size and Asymmetry**

Sam H. Au<sup>1,2</sup>, Jon Edd<sup>1</sup>, Amy E. Stoddard<sup>1</sup>, Keith H.K. Wong<sup>1,2</sup>, Fabio Fachin<sup>1</sup>, Shyamala Maheswaran<sup>2,3</sup>, Daniel A. Haber<sup>3,4,5</sup>, Shannon L. Stott<sup>1,3,4</sup>, Ravi Kapur<sup>1</sup> and Mehmet Toner<sup>1,2,6\*</sup>

<sup>1</sup> Center for Engineering in Medicine, Massachusetts General Hospital, Harvard Medical School, Boston, MA 02114.

<sup>2</sup> Department of Surgery, Massachusetts General Hospital, Harvard Medical School, Boston, MA 02114.

<sup>3</sup> Massachusetts General Hospital Center for Cancer Research, Harvard Medical School, Charlestown, MA 02129.

<sup>4</sup> Department of Medicine, Massachusetts General Hospital, Harvard Medical School, Boston, MA 02114

<sup>5</sup> Howard Hughes Medical Institute, Bethesda, MD, 20815.

<sup>6</sup> Shriners Hospital for Children, Boston, MA, 02114.

## Supplementary Figures

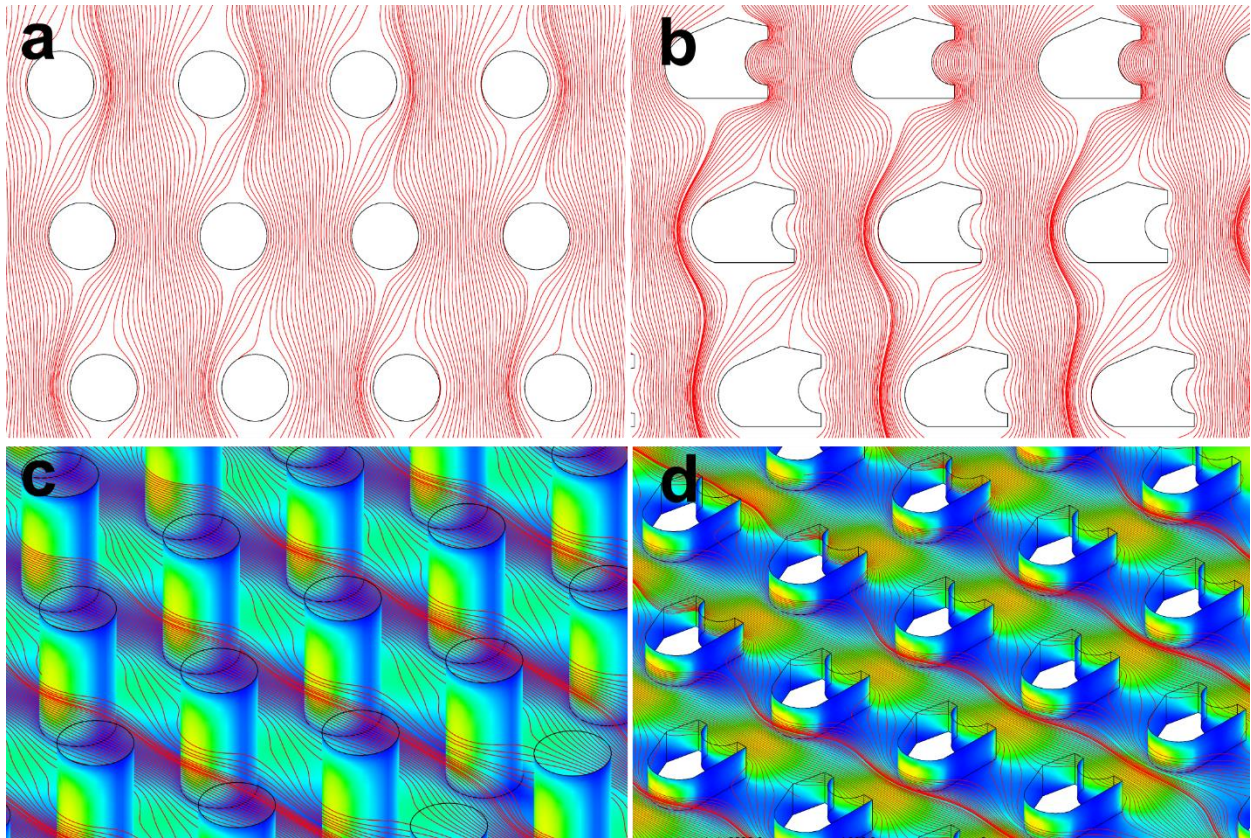

**Fig S1:** Computation fluid dynamic models. Mid-plane cut plane projections showing (a) Stage 1 – undisturbed fluid streamlines and (b) Stage 2 – streamline asymmetry between pillar. 3D computation model with streamlines (red lines) and shear stress intensity (colored planes) for processing 0.5 mL blood per hour: (c) Stage 1, peak shear stress = 2.9 Pa, (d) Stage 2, peak shear stress = 4.8 Pa. Magnitude of shear stress ranges from 0-7 Pa (green-red).

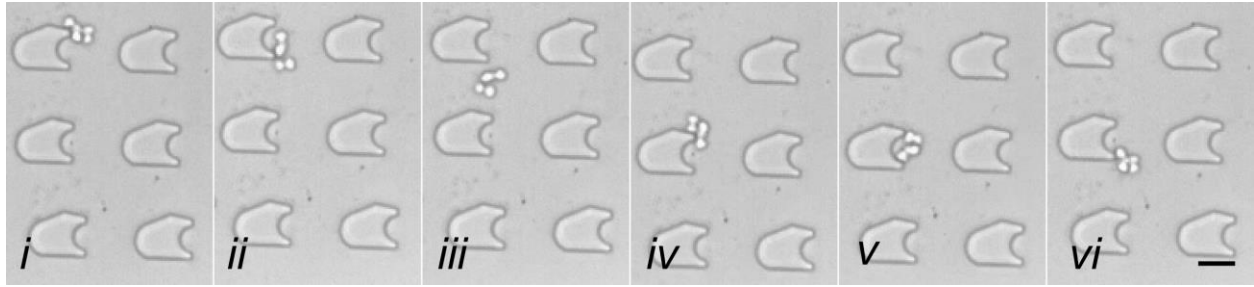

**Fig S2:** Frames captures using a high speed camera showing rotation of small cluster as it transits past asymmetric pillars in Stage 2. Scale bar: 50  $\mu\text{m}$

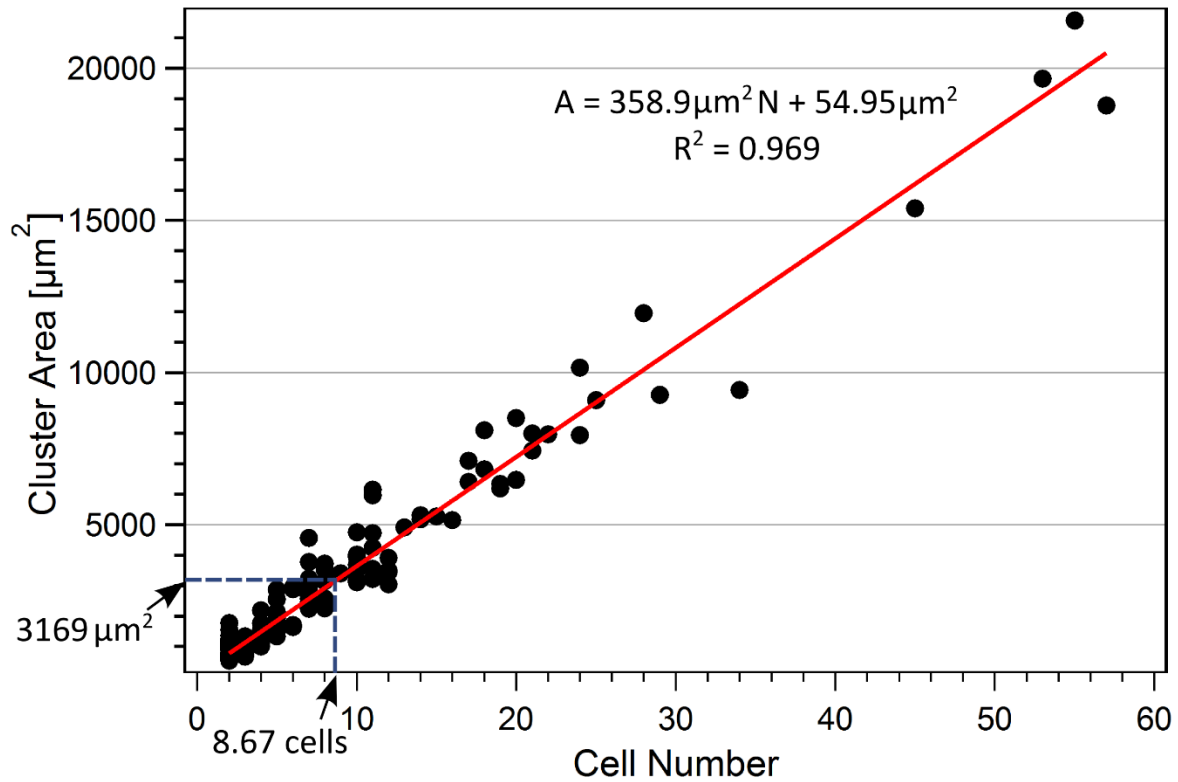

**Fig S3:** Correlation of area vs. cell number for 203 cluster events analyzed using custom Matlab® scripts. Large/Small cluster cut-off was defined as 3169  $\mu\text{m}^2$  which corresponded to a cut-off of ~ 8.67 cells. Data fit to least squares linear regression.

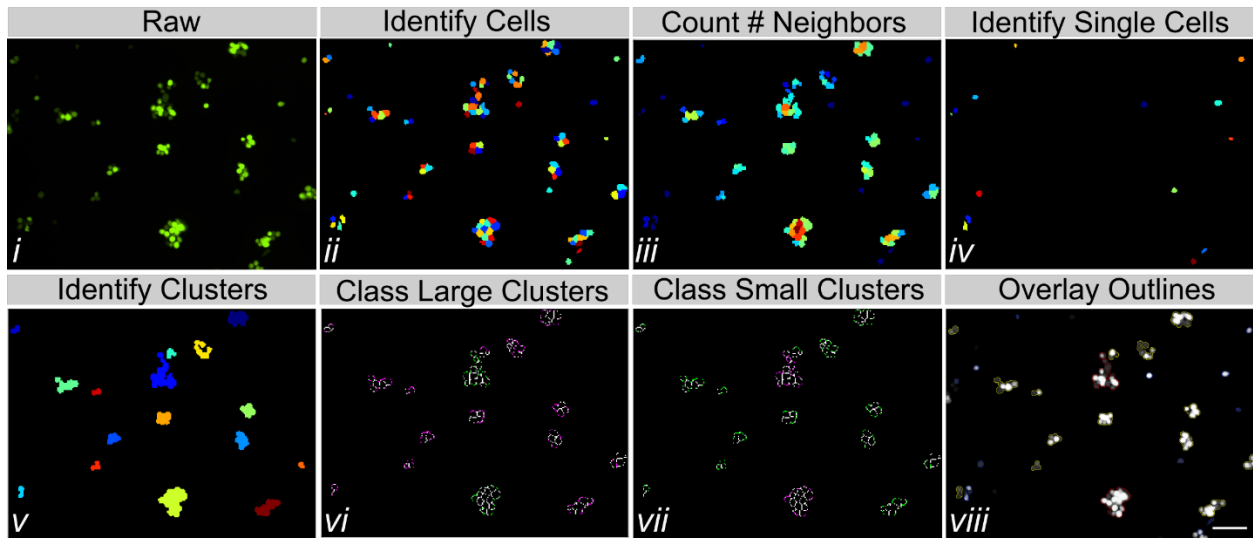

**Fig S4:** Sample image processing pipeline showing processing of a raw image into final image with overlaid outlines.

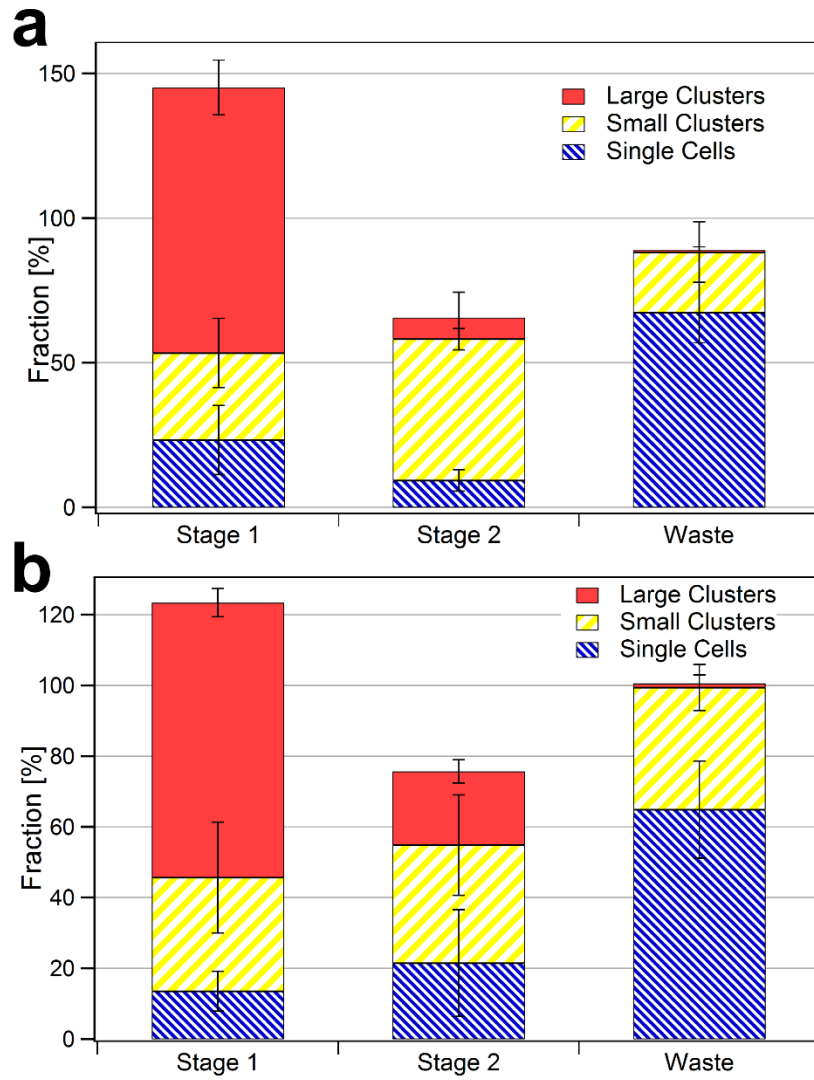

**Fig S5:** Fraction of total large clusters (red), small clusters (yellow) and single cells (blue) that partitioned to Stage 1 product, Stage 2 product and Waste outputs for (a) cell/clusters run in buffer and (b) cell/clusters run in whole blood. Data is an alternative plotting of figures 4a,c.

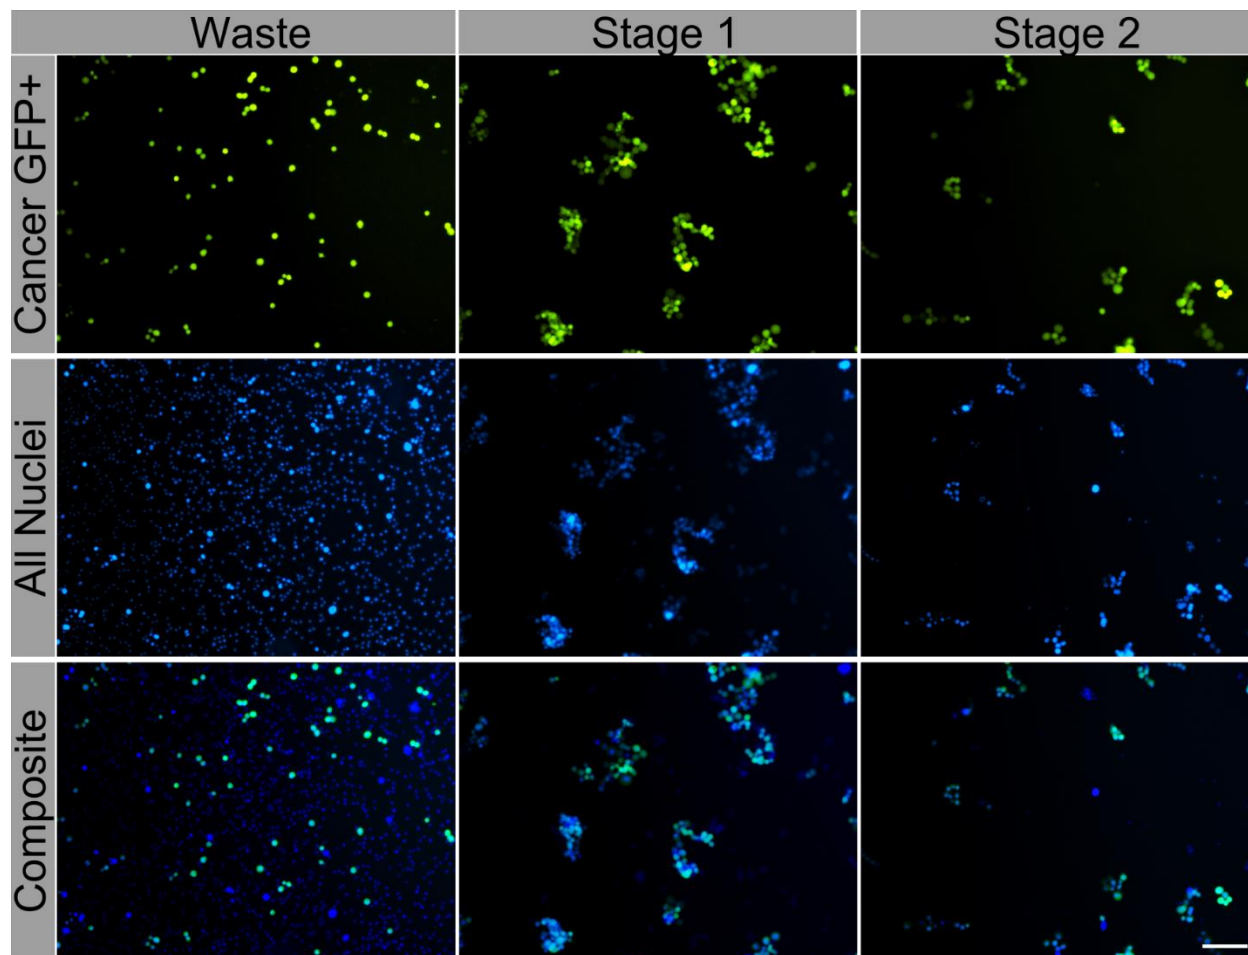

**Fig S6:** Sample images used for determining white blood content in Waste, Stage 1 and Stage 2 outputs. Cancer cells express GFP (top), nuclei stained with Hoescht 33342 (middle) and composite (bottom). Scale bar: 100  $\mu$ m.



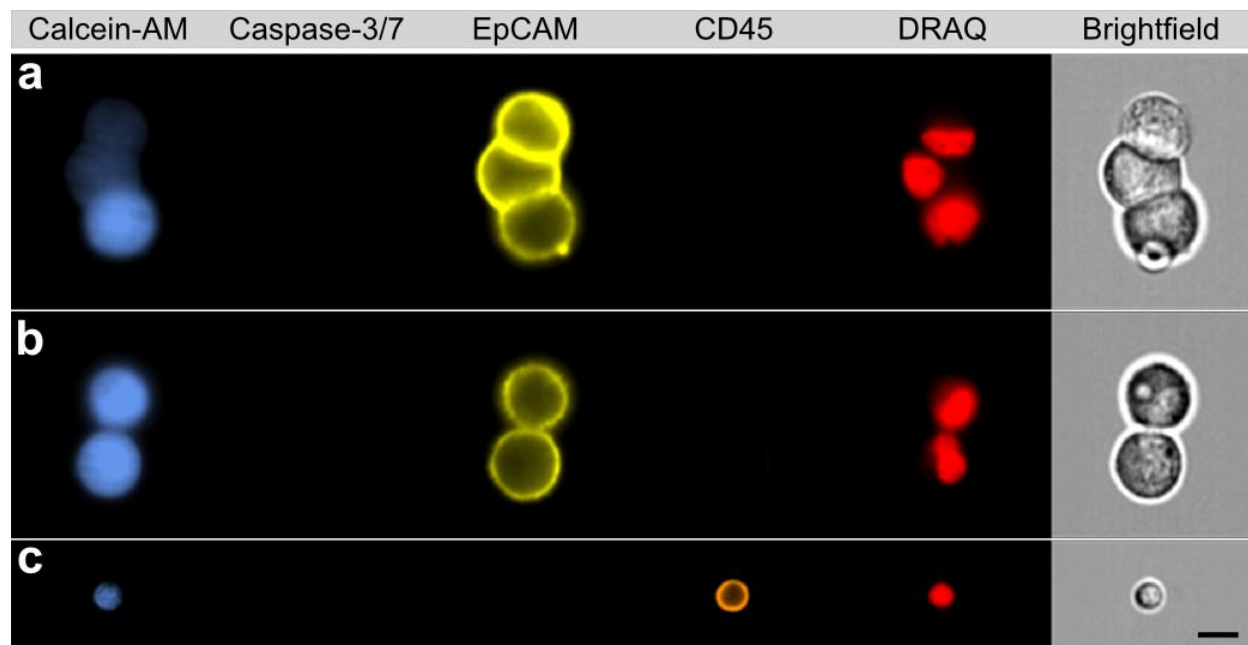

**Fig S7:** Multispectral flow cytometry images of EpCAM<sup>+</sup>/CD45<sup>-</sup> CTC clusters from (a) Stage 1 product and (b) Stage 2 product; with (c) EpCAM<sup>-</sup>/CD45<sup>+</sup> white blood cell from Stage 1 product for comparison. Cells were stained for viability (blue), Caspase-3/7 (green), EpCAM (yellow), CD45 (orange) and DNA (red). Scale bar: 10  $\mu$ m.



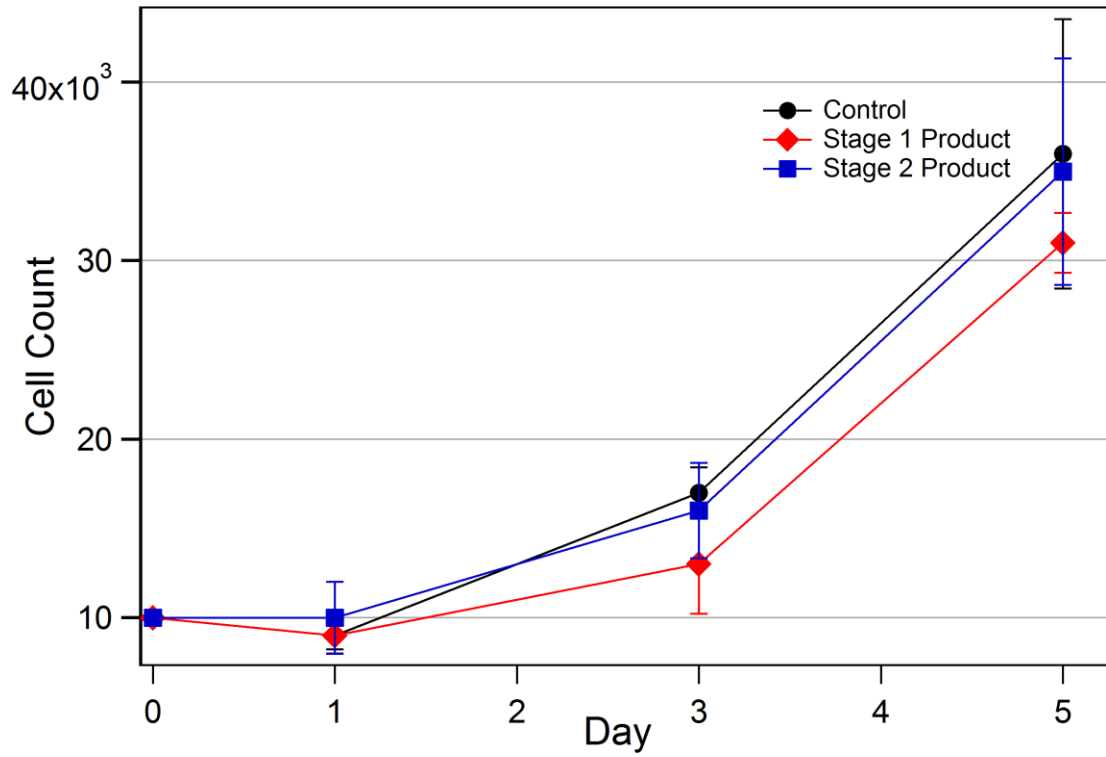

**Fig S8:** Growth curve of CTC clusters cultured for five days after isolation in ultra low attachment 96 well plates: control (black circles), Stage 1 product (red diamonds) and Stage 2 product (blue squares). Error bars represent one standard deviation, experiment conducted in triplicate.

## Movies

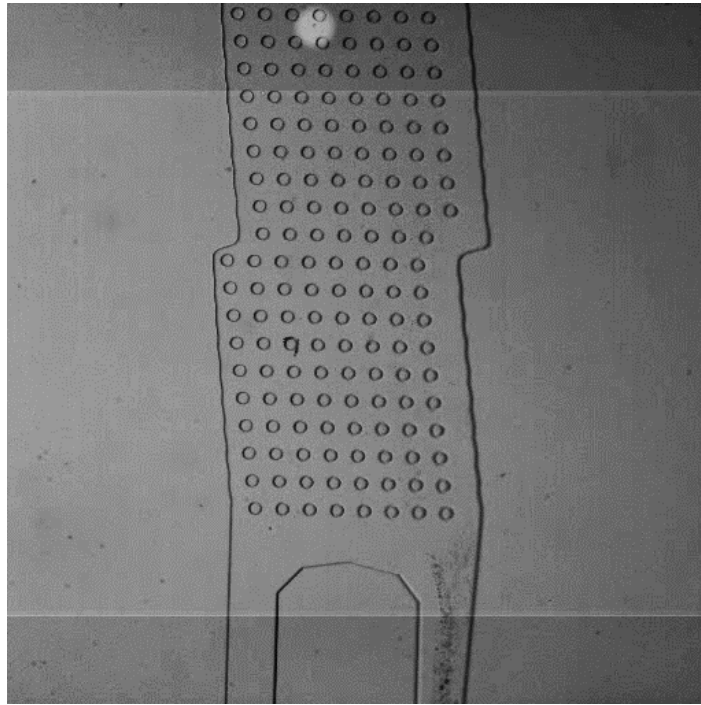

**Movie S1:** High speed video of two-cell cluster tending to align along vertical axis during sorting through array of cylindrical pillars in 90  $\mu\text{m}$  high Stage 1 device.

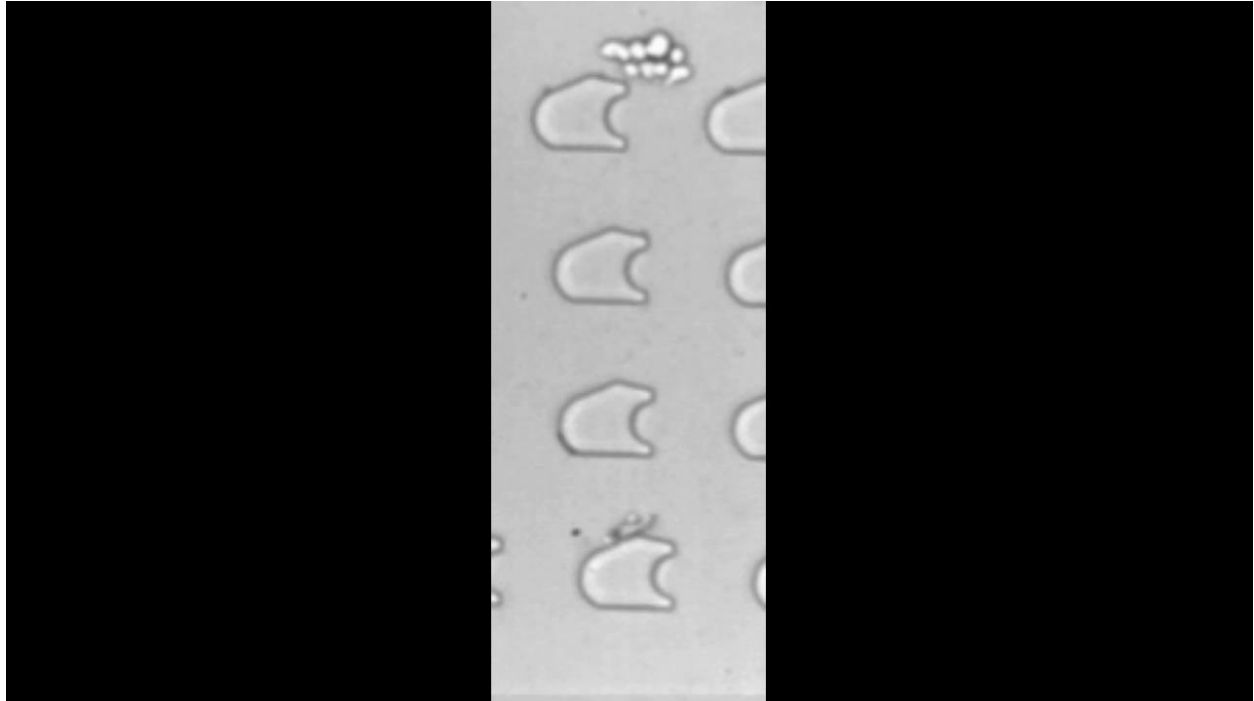

**Movie S2:** High speed video capturing small CTC cluster behavior. Custom designed pillars in 30  $\mu\text{m}$  high device effectively deflect small CTC cluster because of cluster rotation.

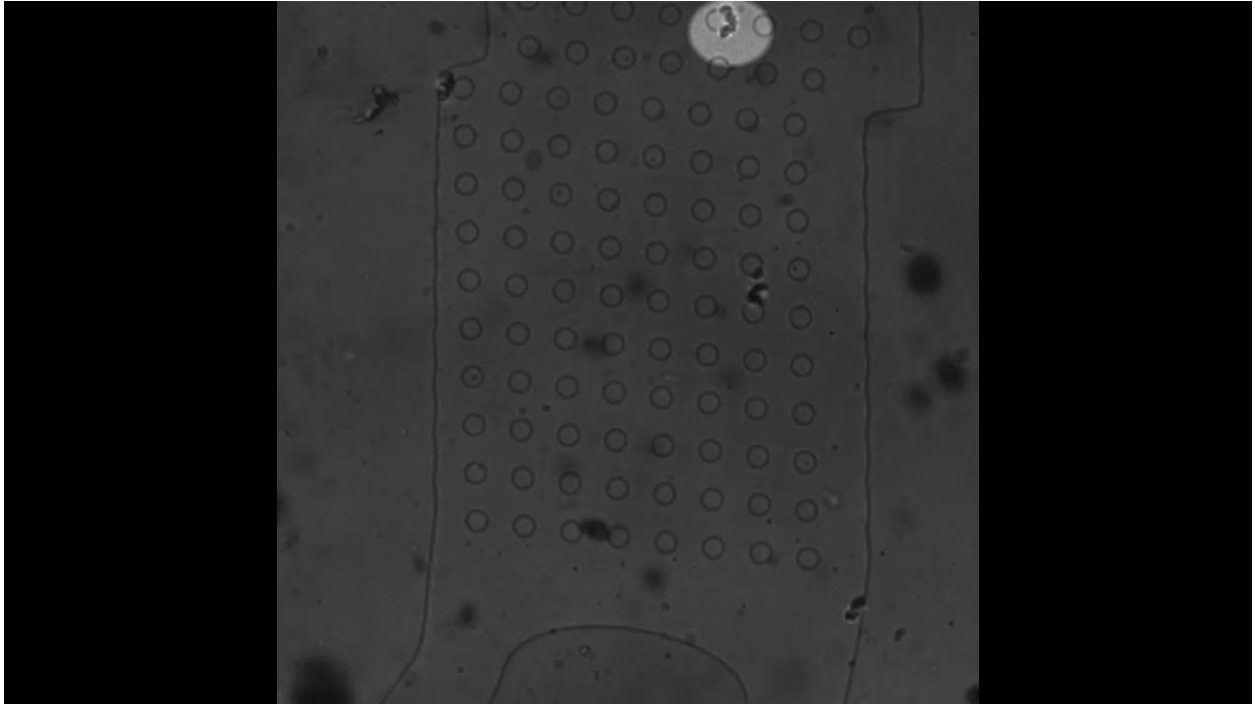

**Movie S3:** Cylindrical pillars in 30  $\mu\text{m}$  high device is unable to deflect small CTC cluster because of minimal rotation behavior. Cluster ends up in Waste (left) stream.

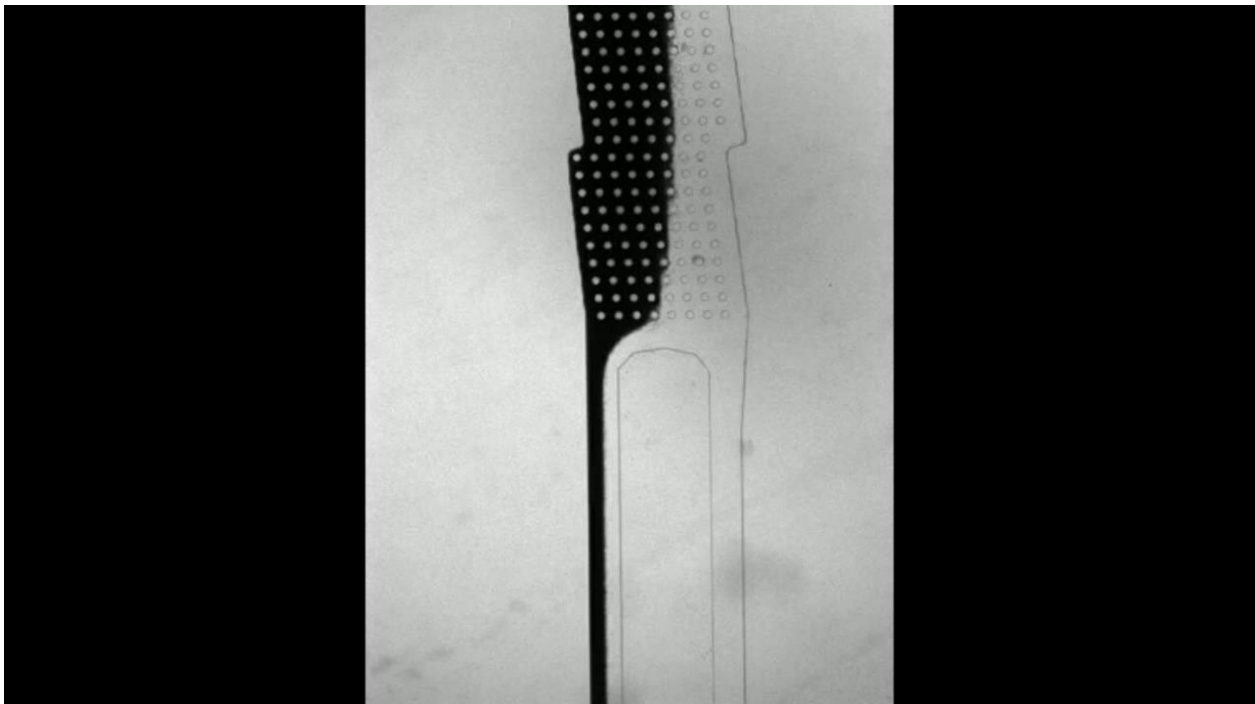

**Movie S4:** Exit streams of Stage 1 showing deflection of CTC clusters out of whole blood in 90  $\mu\text{m}$  high device.

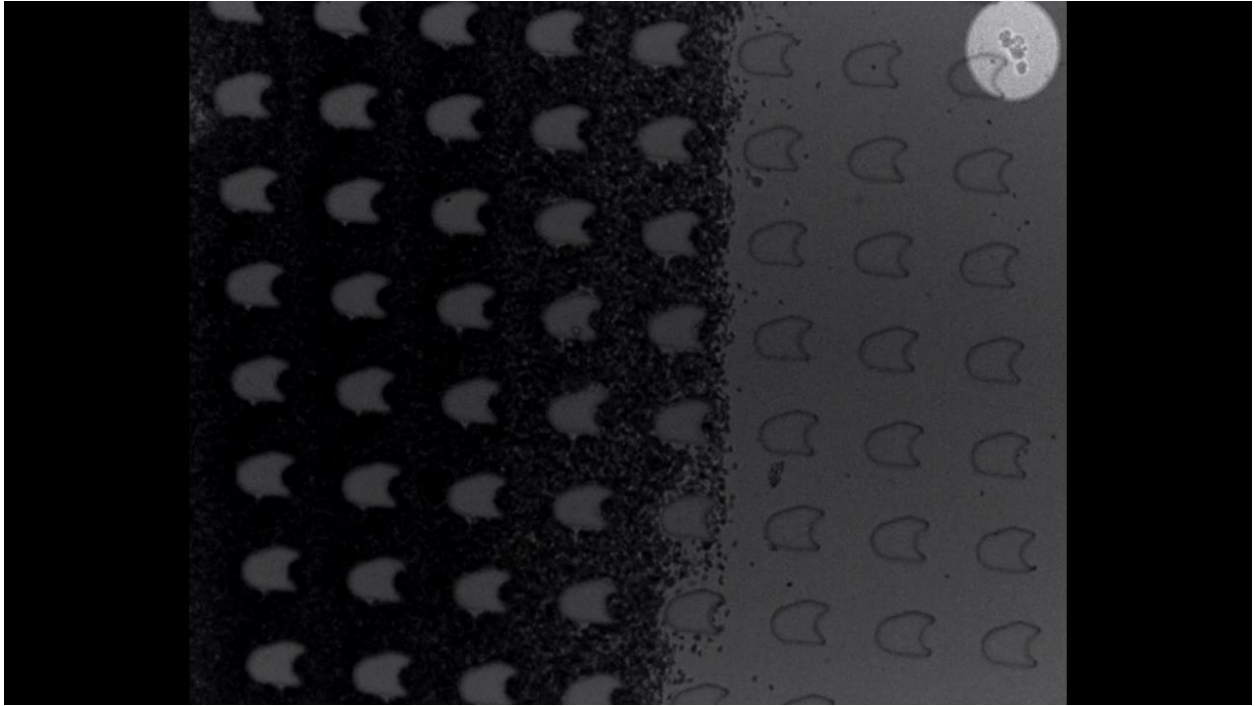

**Movie S5:** Two sequential CTC clusters being rotated and bumped by asymmetric pillars allowing deflecting even though transverse axis are less than critical diameters in Stage 2 pillars in 30  $\mu\text{m}$  high device.

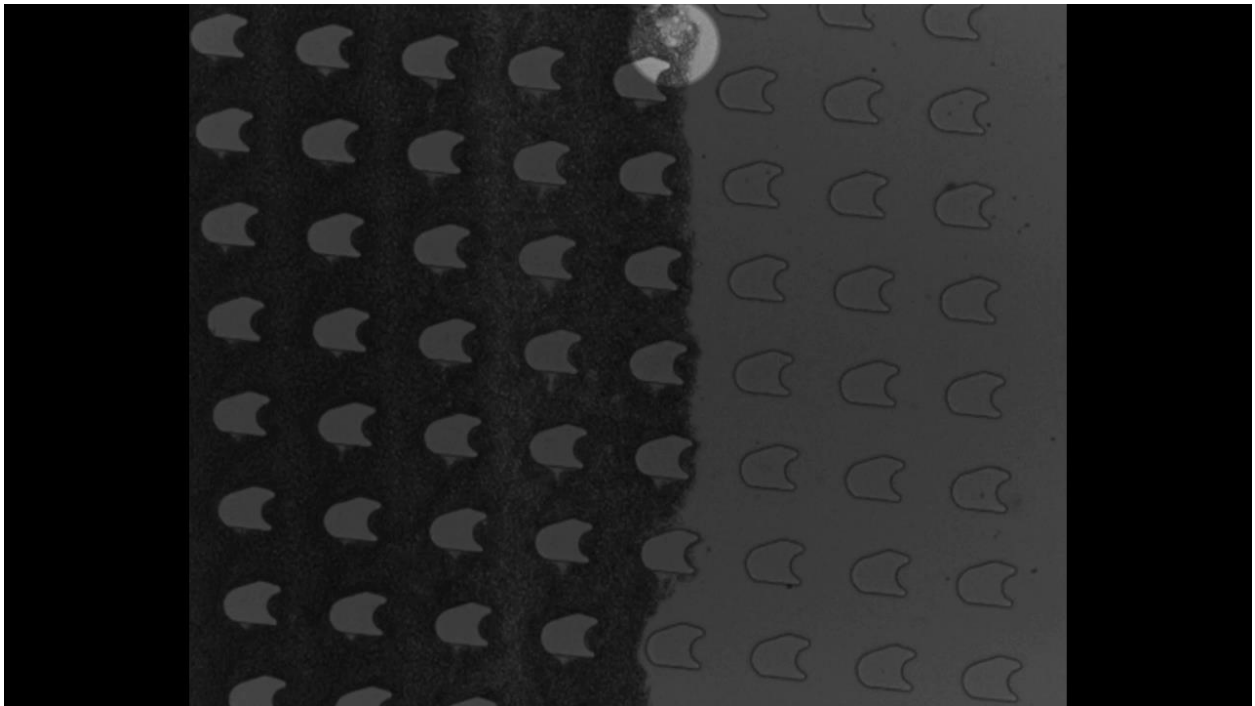

**Movie S6:** CTC clusters being deflected out of whole blood by Stage 2 pillars in 30  $\mu\text{m}$  high device.
